# Supplementary material for: β-Carotene accelerates the resolution of atherosclerosis in mice
Source: eLife. 2024 Feb 6;12:RP87430. doi: 10.7554/eLife.87430 (PMC10945528; doi:10.7554/eLife.87430)
Supplement: Source data 1. [file elife-87430-data1.xlsx]

## Sheet: Figure 1
Figure 1B
	Baseline										Control														β-carotene
Total Cholesterol	474.8	681.9	831.9	498.6	468.666	473.344	668.568	688.66	422.784	998.079	151	122.4	151	143.8	62.9	62.9	242.794	220.423	133.817	160.147	241.475	142.694	91.654	182.218	210.647	62.9	190.015	72.401	115.824	264.386	130.998	124.161	172.982	58.1	141.4	186.7	89	43.8
HDL-C	51.25	54.25	42.125	15.2917	62.25	43.4583	60.8333	104.667	122.375		42.75	82.7917	7.375	73.5417	44.625	26.625	39.75	17.625	55.8333	78.125	100.667				14.0417	58.3333	16.7083	42.4167	27.2917	22.25	107.792	54.3333	43.8333	67.7917
Triglycerides	245.71	112.13	286.42	352.13	180.71						69.99	26.42	44.99	7.85	16.42										34.99	18.56	14.99	40.71	17.13
Figure 1C					Figure 1D					Figure 1E				Figure 1G				Figure 1H				Figure 1J				Figure1K				Figure 1L				Figure 1M
Fraction	Baseline	Control	β-carotene		Fraction	Baseline	Control	β-carotene		Baseline	Control	β-carotene		Baseline	Control	β-carotene		Baseline	Control	β-carotene		Baseline	Control	β-carotene		Baseline	Control	β-carotene		Baseline	Control	β-carotene			CD68	Collagen
0	0	0	0		0	0	0	0		1	19.9832	19.8938		0.562235	0.287482	0.447666		77.3399	809.612	1132.49		0.141423	0.185119	0.193887		10.98	9.54	6.75		6.12437	6.99765	5.20551		Baseline	10.98	6.12
1	0	0	0		1	0	0	0		1	23.2677	35.5718		0.933522	0.466761	0.454031		179.101	297.473	287.831		0.152042	0.083599	0.212624		13.2	12.42	12.96		1.31782	6.63227	15.6552		Baseline	13.2	1.3
2	0	0	0		2	0	0	0		1	21.5337	19.2166		0.972772	0.443423	0.707567		126.189	395.362	906.688		0.199992	0.220954	0.260449		18.51	13.44	11.79		1.25667	3.34218	14.3313		Baseline	18.51	1.26
3	0	0	0		3	0	0	0		1	26.3155	20.8945		0.354314	0.6471	0.572843		144.521	80.0019	363.306		0.240741	0.256661	0.119439		13.23	11.25	12.24		4.3354	9.76271	13.0261		Baseline	13.23	4.33
4	0	0	0		4	0	0	0			19.4561	31.7701			0.838048	0.614215		211.45	156.968	553.517		0.109825	0.136432	0.07538		17.64	9.69	8.91		9.05397	15.4832	21.3082		Baseline	17.64	9.05
5	0	0	0		5	0	0	0				24.0802				0.54314		162.36	166.905	300.004		0.436983	0.249732	0.21274		11.26	12.69	13.05		4.70707	12.4133	13.5128		Baseline	11.26	1.4
6	0	0	0		6	5.90624	0	0				10.1356				0.60785		472.545	228.623	789.852		0.292755	0.372098	0.252291		8.92	11.17	7.95		1.89596	7.26255	7.13514		Baseline	8.92	1.89
7	53.3792	4.00242	1.7255		7	25.195	0	0										96.8763	60.45	784.69		0.233153	0.403328	0.304253		17.23	3.25	10.33		1.40406	6.70316	14.6772		Baseline	17.23	4.71
8	188.368	4.26265	0.16418		8	44.7696	0	0										868.437	248.916	505.537		0.274771	0.10321	0.144537		36.16	15.01	9.3		4.27863	3.69618	6.66314		Baseline	36.16	4.28
9	128.908	1.79055	2.05077		9	31.7675	1.1912	0										628.659	236.143	706.235		0.202445	0.175608	0.03324		30.14	13.16	7.24		7.51665	6.13492	14.1772		Baseline	30.14	7.52
10	36.595	0.94484	0		10	8.19232	0	0										517.406	728.236	930.031			0.135274	0.296377			13.75	12.29			8.75233	19.4673		Control	9.54	6.99
11	40.3682	0.29429	0		11	7.76368	0	0										341.189	581.447	1025.82				0.202968				6.19			9.79118	13.291		Control	12.42	6.63
12	26.0561	0.68462	0		12	9.764	0	0												718.697				0.159733				8.35						Control	13.44	3.34
13	33.7976	0.4244	0		13	6.62064	0	0												314.509														Control	11.25	9.76
14	32.8218	0.29429	0		14	5.90624	0	0																										Control	9.69	15.48
15	46.9387	1.7255	0		15	6.04912	0	0																										Control	11.17	6.7
16	49.671	1.79055	0		16	11.1928	0	0																										Control	3.25	7.26
17	74.3919	3.87231	0.03407		17	13.1931	0	1.76272																										Control	15.01	6.13
18	74.7823	4.84814	1.14		18	13.4789	0	0																										Control	13.16	8.7
19	69.0574	7.51539	1.07495		19	13.7646	0	1.47696																										Control	13.75	9.8
20	64.6987	6.60463	0.359345		20	11.1928	0	0																										β-carotene	7.75	5.2
21	65.2192	5.10836	0		21	12.3358	0	0																										β-carotene	12.96	15.65
22	50.3216	3.67715	0		22	10.4784	0	0																										β-carotene	11.79	14.33
23	43.2306	5.23847	0.68462		23	11.1928	0	0																										β-carotene	12.24	13.02
24	20.9167	4.13253	0.68462		24	7.6208	0	0																										β-carotene	8.91	21.31
25	13.1101	5.49869	1.33517		25	3.90592	0	0																										β-carotene	13.05	13.51
26	11.0934	3.28682	1.46528		26	2.62	0	0																										β-carotene	7.95	14.68
27	7.12507	3.41693	1.40023		27	2.33424	0	0																										β-carotene	9.3	13.29
28	4.58792	1.92067	1.00989		28	0	0	0																										β-carotene	7.24	7.14
29	4.71803	2.11583	1.92067		29	0	0	0																										β-carotene	6.19	14.18
30	24.5203	21.4398	17.8254		30	0	0	0																										β-carotene	8.35	19.47
31	29.4996	26.1729	22.3003		31	0	0	0																										β-carotene	12.29	6.66
32	34.8645	33.2294	25.8286		32	0	0	0
33	45.4964	41.9211	31.4223		33	0	0	1
34	55.0422	50.4526	41.6836		34	4.90608	0	2
35	64.6653	58.8207	49.6008		35	6.192	2.19136	5
36	51.9441	46.8263	42.9538		36	5.90304	3.90592	5
37	25.0302	24.5378	23.2469		37	6	4.47744	6
38	13.8047	12.576	10.9409		38	1.9056	0	4
39	13.9768	8.18714	7.84292		39	0	0	0
40	8.49315	6.98236	6.29391		40	0	0	0
41	6.78399	8.18714	6.72419		41	0	0	0
42	0	0	0		42	0	0	0
43	0	0	0		43	0	0	0
44	0	0	0		44	0	0	0
45	0	0	0		45	0	0	0

## Sheet: Figure 1-suppl figure 1
Suppl 1A
	Female						Male							Suppl 1B
Week	Baseline		Control		β-carotene		Baseline		Control		β-carotene			Baseline	Control	β-carotene
	Mean	SD	Mean	SD	Mean	SD	Mean	SD	Mean	SD	Mean	SD		1	0.76119	9.18886
1	16.65	0.65	17.3	0.2	17.48	0.494368	21.6667	0.760117	22.94	0.879545	22	0.447214		1	1.36357	12.9584
2	17.8	0.8	18.06	0.263818	18.44	0.646993	24.5	0.731209	24.74	1.17371	24.32	0.257682		1	2.21575	1.63772
3	18.3	0.3	19.22	0.174356	18.94	0.448999	26.3	0.975363	25.74	1.0633	25.66	0.352987		1	1.51694	17.6169
4	19.65	1.35	20	0	20.54	0.501597	27.4	1.21106	27.08	1.19474	27.6	0.509902			2.77344	18.9567
5	20	1.2	21.24	0.444522	21.34	0.619355	28.8167	1.78165	28.52	1.25196	28.76	0.621772			5.32394	8.4762
6	21.45	1.45	22.58	0.344093	22.08	0.823043	29.9167	1.86358	29.48	1.29514	30.1	0.927362
7	24	2	23.8	0.2	23.6	1.02956	33.1667	1.77795	32	1.58114	32.6	1.32665
8	23.95	1.75	23.68	0.517107	23.22	0.799625	34.2167	1.79544	32.56	1.42288	32.4	2.53988
9	25.2	1.8	24.38	0.48621	23.92	0.677791	35.3167	2.21997	34.14	1.81593	35.7	1.42829
10	26.3	1.7	25.48	0.560714	24.76	0.861162	36.6833	2.06453	35.36	1.74287	36.76	1.63909
11	28.1	1.9	26.42	0.741889	24.94	0.920652	37.5	2.30261	36.98	1.92987	37.62	1.64359
12	29.5	1.5	27.18	1.08738	26	0.865448	38.8667	2.41973	37.82	2.25663	38.56	1.77471
13	31.75	1.75	27.58	1.21836	26.46	1.16086	39.9	2.62412	39.38	2.46301	39.5	2.04866
14	30.75	0.45	28.98	1.49446	27.4	1.13842	40.3	2.77164	39.92	2.5202	40.12	2.16781
15	31.9	0.9	29.24	1.34633	27.48	1.33955	40.8333	2.87885	40.56	2.76091	40.76	2.01856
16	33.95	1.35	29.78	1.55319	29.08	1.48943	41.9333	3.13152	41.74	2.95103	42	2.03421
17			31.14	1.76369	30.8333	2.35396			42.1	2.8768	42.2333	1.33458
18			30.62	1.83396	30.6	1.58219			41.1	2.91187	42.5667	0.811035
19			30.64	2.0245	30.2333	1.46667			40.54	2.76507	41.9333	1.2252

## Sheet: Figure 2
Figure 2A
	Baseline						Control						β-carotene
Total Cholesterol	950.246	1186.12	1259.59	835.464			528.072	456.551	435.464	407.855			515.899	827.203	503.29	496.551
HDL-C	48.0927	58.0927	47.8753	40.571	63.3971		62.9623	61.2666	61.484	94.4406	94.6579	67.7014	34.484	40.3101	48.571	84.3536	93.7884	59.2666
Triglycerides	426.848	394.276	125.99	296.562	262.276	853.705	153.419	178.276	80.5618	23.9904	42.8475	40.2761	46.2761	92.5618	51.419	90.8475	16.2761
Figure 2C				Figure 2D				Figure 2E				Figure 2F
Baseline	Control	β-carotene		Baseline	Control	β-carotene		Baseline	Control	β-carotene			CD68	Collagen
0.099511	0.207452	0.127809		31.94	23.32	25.96		4.61	7.63	14.4		Baseline	31.94	4.61
0.21635	0.169615	0.264187		34.14	20.14	21.57		5.67	6.37	5.28		Baseline	15.9	5.67
0.031396	0.34705	0.150314		15.9	17.177	17.94		7.048	6.12	7.14		Baseline	30.001	7.048
0.179453	0.250667	0.214716		30.001	18.5027	22.36		0.98	5.8	11.906		Baseline	28.4745	0.98
0.142483				28.4745	22.03	8.86037		2.79	5.92	7.26		Baseline	19.384	2.79
0.221273				30.13	20.248	14.21		2.82	5.31	17.716		Baseline	34.4471	2.82
0.13109				19.384	7.35	14.12		1.68	4.79	15.151		Baseline	27.23	1.68
				34.4471	18.1346	10.29			6.05	5.07		Control	20.14	7.63
				27.23	18.61	19.94						Control	17.177	6.37
												Control	18.5027	6.12
												Control	22.03	8.624
												Control	20.248	9.316
												Control	7.35	8.373
												Control	18.1346	7.615
												Control	18.61	6.05
												β-carotene	25.96	14.4
												β-carotene	17.94	6.162
												β-carotene	22.36	7.381
												β-carotene	8.86037	11.906
												β-carotene	14.21	13.928
												β-carotene	14.12	17.716
												β-carotene	10.29	15.151
												β-carotene	19.94	13.189

## Sheet: Figure 2-suppl figure 1
Suppl 2A														Suppl 2B				Suppl 2C
	Baseline		Control		β-carotene		Baseline		Control		β-carotene			Baseline	Control	β-carotene		Baseline	Control	β-carotene
	Mean	SD	Mean	SD	Mean	SD	Mean	SD	Mean	SD	Mean	SD		0.432236	0.189524	0.295488		148.186	175.997	527.918
1	16	0.154919	16.02	0.329983	15.9	0.463033	15.7667	0.211345	17.6333	1.2045	16.7333	0.452401		0.170378	0.130166	0.354983		180.18	189.681	578.948
2	16.525	0.276586	16.575	0.263944	16.26	0.229129	20.4	0.497996	20.5	0.876071	21.0333	0.112546		0.536554	0.124647	0.19926		140.081	122.701	695.747
3	17.54	0.290861	17.66	0.38658	17.2	0.355809	20.82	0.838689	20.925	1.20234	21.12	0.75326		0.264429	0.174732	0.485269		178.013	173.652	1078.96
4	17.76	0.564447	17.65	0.555385	17.325	0.55263	22.08	0.886228	21.2667	0.862168	21.925	0.992891		0.427882	0.251162	0.482921		65.2077	54.2352	699.84
5	18.15	0.264575	18.24	0.377418	17.5333	0.430813	23.04	1.06611	22.7	1.00416	22.82	1.05707		0.323496	0.843954	0.603917		49.1324	73.4529	285.029
6	19.5	0.555878	18.85	0.522699	18.575	0.65284	24.02	0.98813	23.825	0.919579	23.66	1.07173		0.291271	0.816906	0.22492		50.3135	75.0585	156.231
7	19.44	0.396989	19.1333	0.555063	18.85	0.650333	24.2	0.959166	24.6	1.06615	23.82	0.960417		0.303201	0.229685	0.380797		94.6916	29.1993	238.316
8	19.52	0.891852	18.8	0.759386	19.05	0.817802	25.38	1.22858	25.25	0.825126	25.16	0.935735		0.568178	0.245694	0.643426		133.811	83.0328	447.099
9	20.2	0.510882	20.05	0.73225	20.25	0.652227	24.94	1.186	25.7	1.09773	25.74	1.09206		0.483092	0.886292	0.484772		60.244	20.5613	264.96
10	20.6	0.599166	20.2833	0.975412	20.7	0.892375	24.98	1.12045	27.775	0.67992	26.5	1.07935		0.475533	0.822717	0.628342		68.9985	37.8546	369.177
11	21.98	0.71232	21.2167	0.826622	21.4375	0.733985	27.16	1.47058	28.375	0.958623	27.9	0.906091		0.451159	0.603985				42.1181	297.892
12	22.48	0.953625	21.45	0.873945	21.9375	0.711477			27.9125	0.596299	27.74	1.01482		0.274628					57.2124	741.547
13			21.7917	0.847962	21.9187	0.661879			29.2	2.42109	27.8	1.50013								430.956
14			21.61	0.828127	22.1643	0.845192			30.3	0.390512	27.88	0.991632
15			22.425	0.836927	22.3375	1.30328			27.9		26.65
16			21.925	0.236173	22.3333	1.05032

## Sheet: Figure 3
Figure 3A					Figure 3B					Figure 3D				Figure 3E				Figure 3F				Figure 3G
Baseline	Control	β-carotene	β-carotene WT		Baseline	Control	β-carotene	β-carotene WT		Baseline	Control	β-carotene		Baseline	Control	β-carotene		Baseline	Control	β-carotene			CD68	Collagen
0	0	1.044	0.097308		0	0	140.859	0.618357		0.076375	0.076293	0.151588		13.1698	10.362	3.11951		6.75076	13.0037	12.7535		Baseline	13.1698	6.75076
0	0	2.252	0.116977		0	0	170.416	1.54589		0.083164	0.041863	0.04353		33.6365	8.39003	16.908		5.59597	12.5738	11.1508		Baseline	33.6365	5.59597
0	0	3.637	0.041408		0	0	374.801	0		0.109562	0.088759	0.056423		17.5323	12.9	14.2979		4.12371	9.86	13.6235		Baseline	17.5323	4.12371
0	0	0.951	0.052795		0	0	140.84	0		0.079477	0.229274	0.071844		35.6632	9.4	7.89289		4.46	7.1481	12.8265		Baseline	31.04	4.46
	0	6.329	0.073499		0	0	131.926	0.72657		0.095149	0.18137	0.069826		21.3	13.91	7.7		7.589	14.3066	13.47		Baseline	11.75	7.589
		1.247				0	189.898	0.641546		0.0385	0.339462	0.068986		30.3	6.96	20.49		8.322		14.31		Baseline	22.72	8.322
						0	392.138	0.695652		0.066077		0.226045		26.7	5.06856	7.95		8.07		12.89		Baseline	31.654	8.07
							511.921			0.075253				31.04								Control	10.362	13.0037
							107.436			0.179518				11.75								Control	8.39003	12.5738
										0.317725				22.72								Control	13.91	9.86
										0.248051												Control	6.96	7.14811
																						Control	5.06856	14.3066
																						β-carotene	3.11951	12.7535
																						β-carotene	16.908	11.1508
																						β-carotene	14.2979	13.6235
																						β-carotene	7.89289	12.8265
																						β-carotene	20.49	13.47
																						β-carotene	7.95	14.31
																						β-carotene	25.1798	12.89

## Sheet: Figure 3-suppl figure 1
Suppl 3A				Suppl 3B				Suppl 3C				Suppl 3E
Baseline	Control	β-carotene		Baseline	Control	β-carotene		Baseline	Control	β-carotene		Baseline	Control	β-carotene
775.246	179.377	255.899		0.562235	0.287482	0.447666		868.437	728.236	706.235		2.7	4.58333	6.33333
419.159	205.246	183.725		0.933522	0.466761	0.454031		628.659	581.447	930.031		1.3	4.3	4
722.638	192.203	247.638		0.972772	0.443423	0.707567		517.406	325.535	1025.82		3	9	6.1
500.464	191.551	209.594		0.354314	0.6471	0.572843		552.149	433.663	718.697		1.6	6.2	4.33333
					0.838048	0.614215		589.728	550.465	499.31		2.1	5.6	6.1
						0.54314		97.5514	61.6102	859.545		2.2	5.75
						0.60785		141.363	68.0113	127.534
										184.272

## Sheet: Figure 4
Figure 4C					Figure 4D					Figure 4H
Baseline	Control	β-carotene + IgG	β-carotene + anti-CD25		Baseline	Control	β-carotene + IgG	β-carotene + anti-CD25		Baseline	Control	β-carotene + IgG	β-carotene + anti-CD25
2.58	1.67	1.71	1.02		8.82	4.89	4.57	0.17		4.7	9.8	16.2	10.7
1.55	1.29	3.2	0.27		8.28	6.92	7.67	0.21		0.3	10.6	12.4	10.2
1.79	2.11	1.74	0.77		12.8	7.27	6.79	0.18		2.8	6.6	20.8	5
1.49	1.68	1.42	0.25		11.5	5.27	3.27	3.21		2.3	4.8	15.5	10.7
1.42	1.56	1.1	0.15		9.09	6.05	5.3	2.78		1	12.25	21.7	11.5
2.31	2.01	1.75	0.42		6.58	5.11	8.17	0.85
1.73	2.89	2.78	0.14		7.09	4.59	6.08	1.55
2.09	0.52	0.26	1.47		10.3	2.17	2.08	0.43
2.04	1.07	0.52	0.97		5.69	7.51	1.38	0.53
	2.28	2.13				6.26	5.42
	2.19

## Sheet: Figure 4-suppl figure 1
Suppl 4A					Suppl 4B					Suppl 4C					Suppl 4D
Baseline	Control	β-carotene + IgG	β-carotene + anti-CD25		Baseline	Control	β-carotene + IgG	β-carotene + anti-CD25		Baseline	Control	β-carotene + IgG	β-carotene + anti-CD25		Baseline	Control	β-carotene + IgG	β-carotene + anti-CD25
5.2	3.66	3.58	4.75		19.52	11.81	11.37	11.27		2.62	1.99	1.87	3.73		10.7	6.92	6.8	11.1
3.64	4.52	7.22	2.55		17.01	16.6	18.47	10.31		2.09	3.23	4.02	2.28		8.73	9.68	10.8	10.1
4.68	4.05	3.15	2.97		22.76	15.6	13.78	7.51		2.89	1.94	1.41	2.2		9.96	8.33	6.99	7.33
3.25	2.51	2.43	5.63		24	11.65	7.26	12.15		1.76	0.83	1.01	5.38		12.5	6.38	3.99	8.94
3.4	3.49	2.66	2.96		19.49	13.56	12.84	10.76		1.98	1.93	1.56	2.81		10.4	7.51	7.54	7.98
5.15	5.9	4.74	6.64		17.98	14.6	21.47	10.1		2.84	3.89	2.99	6.22		11.4	9.49	13.3	9.25
2.97	7.13	7.05	3.48		14.6	13.77	14.95	12.05		1.24	4.24	4.27	3.34		7.51	9.18	8.87	10.5
4.1	5.99	4.25	6.96		27.2	13.57	14.48	8.51		2.01	5.47	3.99	5.49		16.9	11.4	12.4	8.08
3.37	4.92	7.29	8.38		14.18	13.19	9.36	9.05		1.33	3.85	6.77	7.41		8.49	5.68	7.98	8.52
	5.57	7.05				10.09	11.42				3.29	4.92				3.83	6
	5.74										3.55

## Sheet: Figure 5
Figure 5B					Figure 5C					Figure 5D					Figure 5E				Figure 5G					Figure 5I
Baseline	Control	β-carotene + IgG	β-carotene + anti-CD25		Baseline	Control	β-carotene + IgG	β-carotene + anti-CD25		Baseline	Control	β-carotene + IgG	β-carotene + anti-CD25			CD68	Collagen		Baseline	Control	β-carotene + IgG	β-carotene + anti-CD25		Baseline	Control	β-carotene + IgG	β-carotene + anti-CD25
0.187712	0.102486	0.179531	0.209592		21.1894	17.7455	6.31013	17		10.13	14.3	14.79	9.76		Baseline	17.88	11.03		0.05025	0.486833	1.588	1.05633		4.37905	3.72975	16.7287	17.0973
0.175081	0.131983	0.060232	0.070349		17.8801	12.821	8	16.99		11.03	9.3	14.28	12.85		Baseline	26.32	3.31		0.163625	0.971	1.63975	1.5285		1.03941	2.79253	11.467	12.9706
0.182425	0.195382	0.165218	0.125951		26.3218	17	5.98	9.99		3.31	15.63	14.78	7.99		Baseline	23.35	6.05		0.3985	0.527667	1.383	1.36058		1.65641	2.78116	11.0647	12.0101
0.11537	0.133774	0.192874	0.137392		23.3532	10.07	13.5	16.87		6.05	11.73	18.47	14.85		Baseline	14.15	4.68		0.034	1.179	3.4555	1.66778		1.11457	2.87042	15.5766	12.747
0.172924	0.104132	0.06934	0.141655		14.15	8.23	12.44	17.88		4.68	8.33	16.25	11.99		Baseline	27.97	4.65		0.05325	1.26167		1.21404		1.99357	0.73198	10.8017	15.7549
0.136471	0.040324	0.090178	0.100241		27.97	30.48	10.29	19		4.65	5.98	17.27	5.93		Baseline	18.46	7.78		0.140667							16.4774
0.185105	0.095152	0.107849	0.124768		18.46	17.5	12.5	18.26		7.78	10.41	14.11	16.284		Baseline	41.88	6.02
0.043802	0.143234	0.097948	0.169963		41.88	19.27	7.22	11.93		6.02	13.36	14.96			Baseline	16.24	6.07		Figure 5K					Figure 5M
0.184634	0.257092	0.131037	0.06766		16.24	12.65	17			6.07	16.45	16.12			Control	12.82	9.59		Baseline	Control	β-carotene + IgG	β-carotene + anti-CD25		Baseline	Control	β-carotene + IgG	β-carotene + anti-CD25
	0.160764	0.134319	0.124271			9.42	9.06				14.75	17.5			Control	17.89	15.63		9.39	4.27484	4.02412	6.81585		1.2611	11.7021	11.8671	9.32018
															Control	10.07	11.73		46.4167	11.0166	8.33388	4.61754		6.33752	4.16667	3.20513	10.7143
															Control	8.23	8.33		18.6667	2.89435	4.1831	7.56767		6.51856	6.41731	1.52068	1.31027
															Control	12.5	5.982		57.99	25.7139	2.8205	4.58832		6.51856	13.3929	11.0375	3.61533
															Control	17.5	10.41		21.9	22.3822	3.17141	9.60498		9.44245	8.11209	5.06073	13.5031
															Control	19.27	13.36
															Control	12.65	16.45
															Control	9.42	14.75
															β-carotene + IgG	6	14.28
															β-carotene + IgG	5.98	14.79
															β-carotene + IgG	14.27	18.47
															β-carotene + IgG	12.44	16.25
															β-carotene + IgG	10.29	17.27
															β-carotene + IgG	30.48	14.113
															β-carotene + IgG	7.22	14.96
															β-carotene + IgG	18.58	16.12
															β-carotene + IgG	9.06	17.5
															β-carotene + anti-CD25	16.99	9.75537
															β-carotene + anti-CD25	9.99	12.85
															β-carotene + anti-CD25	16.87	7.99
															β-carotene + anti-CD25	17.88	14.85
															β-carotene + anti-CD25	21.57	11.99
															β-carotene + anti-CD25	18.26	5.93
															β-carotene + anti-CD25	11.93	16.384

## Sheet: Figure 5-suppl figure 1
Suppl 5B
Baseline	Control	β-carotene + IgG	β-carotene + anti-CD25
6	4.75	2.66667	5.25
3.5	7	5.86667	3.66667
1.75	4.66667	4.25	5.5
2	4	7	5
3.33333	4.66667		4.5
